# Supplementary material for: An allosteric key strand controlled adaptable CRISPR/Cas12a biosensing platform for point-of-care testing of multiple types of targets
Source: Royal Society of Chemistry journal article supplement (doi:10.1039/d5lc01029b), 2026-01-01
Supplement: d5lc01029b1.pdf [file d5lc01029b1.pdf]

## ***Supporting information***

### **An allosteric key strand controlled adaptable CRISPR/Cas12a biosensing platform for point-of-care testing of multiple types of targets**

Juan Li<sup>a</sup>, Tong Shao<sup>a</sup>, Xin-Jiao Cao<sup>a</sup>, Ya-Xin Wang<sup>a\*</sup>, De-Ming Kong<sup>b</sup>.

*<sup>a</sup>School of Pharmacy, Binzhou Medical University, Yantai, Shandong, 264003, PR  
China*

*<sup>b</sup>College of Chemistry, Nankai University, Tianjin, 300071, PR China.*

*\*Corresponding author: [yaxinwang@bzmc.edu.cn](mailto:yaxinwang@bzmc.edu.cn)*

|                                                                              |          |
|------------------------------------------------------------------------------|----------|
| <b>1. Experimental section .....</b>                                         | <b>3</b> |
| 1.1 Materials and reagents.....                                              | 3        |
| 1.2 Apparatus.....                                                           | 6        |
| 1.3 Non-denaturing polyacrylamide gel electrophoresis.....                   | 6        |
| 1.4 Fluorescence experiments .....                                           | 7        |
| 1.5 Recovery experiment.....                                                 | 7        |
| 1.6 Analysis of UDG activity in cell lysate .....                            | 8        |
| <b>2. Allosteric key strand activated CRISPR/Cas12a biosensor .....</b>      | <b>9</b> |
| 2.1 Verify the feasibility of the CRISPR trans-cleavage system .....         | 9        |
| 2.2 Optimization of reaction conditions for HPV-16 detection .....           | 11       |
| 2.3 Table S2. Recovery of HPV-16 detection in serum from human samples ..... | 12       |
| 2.4 Optimization of reaction conditions for kanamycin.....                   | 13       |
| 2.5 Table S3. Detection of recovery of KAN in pure milk and lake water ..... | 14       |
| 2.6 Optimization of UDG detection reaction conditions.....                   | 15       |
| 2.7 UGI inhibitor analysis .....                                             | 16       |
| 2.8 UDG expression in cancer cells .....                                     | 16       |
| 2.9 Detection of UDG activity in cancer cell lysate.....                     | 17       |
| 2.10 Cas12/13 nucleic acid strips to validate three target sensors .....     | 17       |

# 1. Experimental section

## 1.1 Materials and reagents.

All LS sequences and crRNA sequences used in this experiment were synthesized and purified by Gen Script Biotechnology Co., Ltd. (Nanjing, China). Other DNA oligonucleotide sequences were synthesized and purified by Sangon Biotechnology Co., Ltd. (Shanghai, China) (Table S1). EnGen® Lba Cas12a (Cpf1) nuclease (M0653T), 10× NEBuffer 2.1 buffer (500 mM NaCl, 100 mM Tris-HCl, 100 mM MgCl<sub>2</sub>, 100 µg/mL BSA, pH 7.9) (B6002), Na<sub>2</sub>HPO<sub>4</sub>·12H<sub>2</sub>O (10020328) and KH<sub>2</sub>PO<sub>4</sub> (10017618) were purchased from Sinopharm Group Chemical Reagent Co., LTD. (Shanghai, China). KCl (7447-40-7) was purchased from the Sinopharm Chemical Reagents Network. MgCl<sub>2</sub> (7786-30-3) was secured from Shanghai Maclin Biochemical Technology Co., LTD. (China, Shanghai). NaCl (7647-14-5) was purchased from Tianjin Beilian Fine Chemical Development Co., LTD. (Tianjin, China). Endonuclease IV (M0304), NEBuffer™3 (100 mM NaCl, 50 mM Tris-HCl, 10 mM MgCl<sub>2</sub>, 1 mM DTT, pH 7.9), Uracil glycosylase Inhibitor (UGI) (M0281), Human Alkyl Adenine DNA Glycosylase (HAAG) (M0313) were purchased from New England Biolabs (Beijing, China). Kanamycin sulfate (KAN) (B25656) was purchased from Shanghai Yuanye Biotechnology Parts Co., Ltd. (Shanghai, China). Chlortetracycline (Chl) (100940-65-6), oxytetracycline (Oxy) (6153-64-6), levofloxacin (Lev) (100986-85-4), doxycycline hydrochloride (Dox) (10592-13-9), and enrofloxacin (Enr) (93106-60-6) were purchased from Aladdin Biochemical Technology Co., Ltd. (Shanghai, China). 30% Rubber liquid, Uracil DNA glycosidase (UDG) (U8181), and Recombinant human OGG1 (OGG1) (P02796) were purchased from Beijing Solarbio Technology Co., LTD. (Beijing, China). Tetramethylethylenediamine (TEMED), Ammonium persulphate (APS), BeyoAP Alkaline Phosphatase (ALP) (D7027), T4 Polynucleotide Kinase (T4 PNK) (D7096), Protein Standard (BSA) (P0007), and Western and IP cell lysates were purchased from

Beyotime Biological Co., LTD. (Shanghai, China). 20bp DNA Ladder (Japan Takara), 6× DNA loading buffer (Kangwei Jiangsu), Super GelRed Nucleic acid dye (US Everbright). Cas12/13 special nucleic acid test strip was purchased from Guangzhou Bio-lifesci Biotechnology Co., Ltd. (Guangzhou, China). 10% FBS, 1% double-antibody (Penicillin-Streptomycin), DEME medium, cells were used in PBS and diethyl coke carbonate (DEPC) prepared and diluted from Sangon Biotechnology Co., Ltd. (Shanghai, China). Serum from healthy clinical human samples was provided by Yantai Affiliated Hospital of Binzhou Medical College (Yantai, Shandong). **293T cells, A549 cells, MB-231 cells, and MCF-7 cells were from Cell Bank/Stem Cell Bank, Chinese Academy of Sciences (Shanghai, China).** All other reagents were of analytical grade without requiring further purification.

Table S1 All DNA and RNA sequences

| Name  | Sequence (5'-3')                                                      |
|-------|-----------------------------------------------------------------------|
| LS-5  | CTATCTATGTGAGGTAGGTGGTATAGTCAAACTATACCACCTACCTCACA<br>CATA            |
| LS-7  | CCCTATCTATGTGAGGTAGGTGGTATAGTCAAACTATACCACCTACCT<br>CACATA            |
| LS-10 | TTACCCTATCTATGTGAGGTAGGTGGTATAGTCAAACTATACCACCTA<br>CCTCACATA         |
| LS-12 | TCTTACCCTATCTATGTGAGGTAGGTGGTATAGTCAAACTATACCACCT<br>ACCTCACATA       |
| LS-16 | CTTCTCTTACCCTATCTATGTGAGGTAGGTGGTATAGTCAAACTATACC<br>ACCTACCTCACATA   |
| LS-18 | CTCTTCTCTTACCCTATCTATGTGAGGTAGGTGGTATAGTCAAACTATA<br>CCACCTACCTCACATA |
| LS-20 | CTCTCTTCTTACCCTATCTATGTGAGGTAGGTGGTATAGTCAAACTA<br>TACCACCTACCTCACATA |
| LS-R  | CTCTTCTCTTACCCTATCTATGTGAGGTAGGTGGTATAGTCAAACTATA<br>CCACATACCTCACATA |
| LS-L  | CTCTTCTCTTACCCTATCTATGTGAGGTAGGTGGTATAGTCAAACTATA<br>CCACCTACCTCACATA |
| KS-5  | TTTGACTATACCACCTACCTCACA TAGATAG                                      |
| KS-7  | TTTGACTATACCACCTACCTCACA TAGATAGGG                                    |
| KS-10 | TTTGACTATACCACCTACCTCACA TAGATAGGGTAA                                 |
| KS-12 | TTTGACTATACCACCTACCTCACA TAGATAGGGTAAGA                               |

|        |                                                                    |
|--------|--------------------------------------------------------------------|
| KS-16  | TTTGACTATACCACCTACCTCACA TAGATAGGGTAAGAGAAG                        |
| KS-18  | TTTGACTATACCACCTACCTCACA TAGATAGGGTAAGAGAAGAG                      |
| KS-20  | TTTGACTATACCACCTACCTCACA TAGATAGGGTAAGAGAAGAGAG                    |
| KS     | TTTGACTATACCACCTACCTCACA TAGATAGGGTAAGAGAAGAG                      |
| 2-KS   | GT TTTGACTATACCACCTACCTCACA TAGATAGGGTAAGAGAAGAG                   |
| 4-KS   | TAGT TTTGACTATACCACCTACCTCACA TAGATAGGGTAAGAGAAGAG                 |
| HPV-16 | AATATGTCATTATGTGCTGCCATATCTACTTCAGAACT                             |
| KS-H1  | TTTGACTATACCACCTACCTCACATATTTTTTTTTTGCAGCACATAATGACATATT           |
| KS-H2  | AGTTTCTGAAGTAGATATGTTTTTTTTT GATAGGGTAAGAGAAGAG                    |
| Mis1   | AATATGTCATTATGTGCTGCCATAGCTACTTCAGAACT                             |
| Mis2   | AATATGTCATTATGTGCAGCCATAGCTACTTCAGAACT                             |
| Mis3   | AATATGTCATTATGTGCAGCCATAGCTACTCCAGAACT                             |
| HPV-51 | TCTGCTGTACAACGCGAAGG                                               |
| HPV-18 | GTATATTGCAAGACAGTATTGGAAGTTACAGAGG                                 |
| HPV-58 | ACAGCTAGGGCACACAATGG                                               |
| KS-K1  | TTTGACTATACCACCTACCTCACATA GCGCGCGC GGGACTTGGTTTA                  |
| KS-K2  | GGTAATGAGTCCC CACGCGTG GATAGGGTAAGAGAAGAG                          |
| KS-U   | TTUCTCUTTACCUCTATTTTTGACTATACCACCTACCTCACATAGATAGG<br>GTAAGAGAAGAG |
| miR-21 | TAGCTTATCAGACTGATGTTGA                                             |
| KS-R1  | TTTGACTATACCACCTACCTCACATATTTTTTTTTTCTGATAAGCTA                    |
| KS-R2  | TCAACATCAGTTTTTTTTTTTT GATAGGGTAAGAGAAGAG                          |
| KS-A1  | TTTGACTATACCACCTACCTCACATAGCGCGCGCGACCTGGGGGAGTA                   |
| KS-A2  | TTGCGGAGGAAGGCACGCGTGGATAGGGTAAGAGAAGAG                            |
| KS-M   | TTTCTCTTACCSTATTTTTGACTATACCACCTACCTCACATAGATAGG<br>TAAGAGAAGAG    |
| FB-S1  | FAM-TTATT-BHQ-1                                                    |
| FAM-S2 | TCTTCATCTTCATCTCTCAGTGTAGAGAGATGAAGATGAAGACTGGTT-<br>6'FAM         |
| crRNA  | UAAUUUCUACUAAAGUGUAGAUACUUAUACCACCUACCUCACUA                       |
| LFA-S3 | FAM-TTATT-Biotin                                                   |

In the above table, the red fonts are the Toehold sequence and the complementary sequence; The yellow highlighted base is divided into PAM and complementary sequences. The bases in blue are the KS chain 5'redundant complementary sequence. The underlined part of the solid line indicates the complementary domain of HPV-16 in KS-H1 and KS-H2 (miR-21 in KS-R1 and KS-R2). The underlined part of the dotted line indicates the aptamer sequence bound to kanamycin in KS-K1 and KS-K2 (ATP in KS-A1 and KS-A2). The bases in green are the uracil base sites in KS-U and thio sites in KS-M.

## 1.2 Apparatus.

TU-1901 dual-beam UV spectrophotometer was purchased from General Instruments Co., Ltd. (Beijing, China). PC-96 gradient PCR instrument was acquired from Yuning Instrument Co., Ltd. (Hangzhou, China). F97 Fluorescence spectrophotometer was applied from Light Technology Co., Ltd. (Shanghai, China). PowerPac Basic Electrophoresis instrument was purchased from BIO-RAD Company (USA). Automatic CDD gel imaging system was purchased from Tianeng Technology Co., Ltd. (Shanghai, China). EL 204 electronic balance, FE28 pH purchased from Mettler-Toldo Instruments Co., Ltd. (Shanghai, China). The Mini-10K high-speed centrifuge was recorded from Shuke Instrument Co., Ltd. (Sichuan, China). G560E vortex mixer was cultured from Scientific Industries Limited (USA).

### **1.3 Non-denaturing polyacrylamide gel electrophoresis**

The trans-cis cleavage activity of the three targets was validated by non-denaturing polyacrylamide gel electrophoresis using the constructed 'lock-in hairpin + V-KS' mode biosensor. 1  $\mu$ M KS-H1, 1  $\mu$ M KS-H2, 1  $\mu$ M HPV-16 and 2  $\mu$ M LS were added for HPV-16 detection. 1  $\mu$ M KS-K1, 1  $\mu$ M KS-K2, 1  $\mu$ M KAN and 1.5  $\mu$ M LS were added for KAN detection. 1  $\mu$ M KS-U, 1 U/mL UDG, 4 U/mL End IV and 1  $\mu$ M LS were added for UDG detection. Finally, add 200 nM RNP and 50  $\mu$ M FAM single-label fluorescence (FAM-S2). After the reaction was completed, 2  $\mu$ L 6 $\times$  loading buffer was added to the system. The mixture was evenly mixed and added into the 15% gel electrophoresis hole. The electrophoresis was run in 1 $\times$  TAE buffer (40 mM Tris-acetic acid solution, 2 mM EDTA, pH 8.0), maintaining 1 hour at 120 V voltage. Then, the gel was placed in the gel imager for imaging observation.

### **1.4 Fluorescence experiments**

Before detecting the classification target, we conducted feasibility verification on the whole system. LS (30 nM), RNP (20 nM), NEBuffer 2.1, FB-S1 (500 nM), and different concentrations of KS were added to a total volume of 30  $\mu$ L. The mixed system was incubated in the amplification apparatus at 37 $^{\circ}$ C for 1 hour and then supplemented with DEPC water to a final volume of 100  $\mu$ L. After vortex mixing, the samples were detected by fluorescence. F represents the fluorescence intensity of the sensor with target, while  $F_0$  represents the fluorescence intensity of the sensor without target.

### **1.5 Recovery experiment**

For the nucleic acid target HPV-16 detection, different concentrations of HPV-16 (10 nM, 25 nM,

40 nM) were added to the serum from diluted healthy human samples, and 3.6  $\mu$ L KS-H1, 3.6  $\mu$ L KS-H2, and 1.5  $\mu$ L NEBuffer 2.1 buffers were added to a final volume of 15  $\mu$ L. The rest of the reaction steps are the same as in 1.4 above.

For the small-molecule target kanamycin, different concentrations (10 nM, 50nM, 100 nM, 20  $\mu$ M, 30  $\mu$ M, 45  $\mu$ M) of KAN were added to Yili pure milk (Yantai Laishan Zhenhua Supermarket) and school lake water (Yantai Laishan) after a 50-fold dilution. Then 3  $\mu$ L KS-K1, 3  $\mu$ L KS-K2, and 1.5  $\mu$ L PBS buffer were added to the samples for a total volume of 15  $\mu$ L. The rest of the reaction steps are the same as in 1.4 above.

According to the formula:

Sample spike recovery% = (measured-blank) / spike \* 100%,

RSD% =  $S / \bar{X}$  (S is the standard deviation,  $\bar{X}$  is the measured mean)

## 1.6 Analysis of UDG activity in cell lysate

Human embryonic kidney cells (293T), human non-small cell lung cancer cells (A549), human breast cancer cells (MB-231), and human breast cancer cells (MCF-7) were cultured in DMEM medium supplemented with 10% FBS and 1% double antibody at 37°C in a humid atmosphere containing 5% CO<sub>2</sub>.

When the cell density in the petri dish reached 80%, the cells were centrifuged and the supernatant was discarded. After the cells were washed twice with PBS, 100  $\mu$ L Western and IP cell lysate (contains 20 mM Tris-HCl, 1 mM PMSF, 150 mM NaCl, 1% Triton X-100, sodium pyrophosphate,  $\beta$ -glycerophosphate, EDTA, Na<sub>3</sub>VO<sub>4</sub>, and leupeptin, pH 7.5) was incubated with the washed cells. Then the mixture was placed on ice, and the vortex was oscillated for 15 seconds after removing every 5 minutes. This step was repeated six times. After completion, the cell extract was centrifuged at 12000 rpm at 4°C, and the obtained cell extract was directly used for UDG analysis or stored in sub-packaging at -80°C.

## 2. Allosteric key strand activated CRISPR/Cas12a biosensor

### 2.1 Verify the feasibility of the CRISPR trans-cleavage system

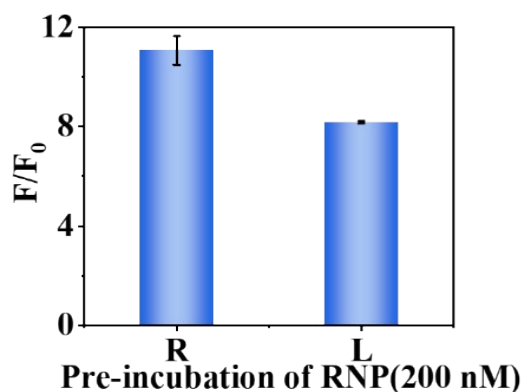

**Fig.S1** The  $F/F_0$  results of RNP incubation in advance (0.5 hours at 37°C). Error bars represent the standard deviation of three repetitive experiments.

As shown in Fig. S1, pre-incubating LbCas12a with crRNA resulted in a higher  $F/F_0$  ratio of the sensor. This improvement can be attributed to the fact that the cleavage activity of CRISPR/Cas12a requires the formation of a complex between LbCas12a and crRNA. Pre-incubation facilitates this binding prior to the reaction, thereby reducing the time required for complex formation during the cleavage process and enhancing the overall efficiency.

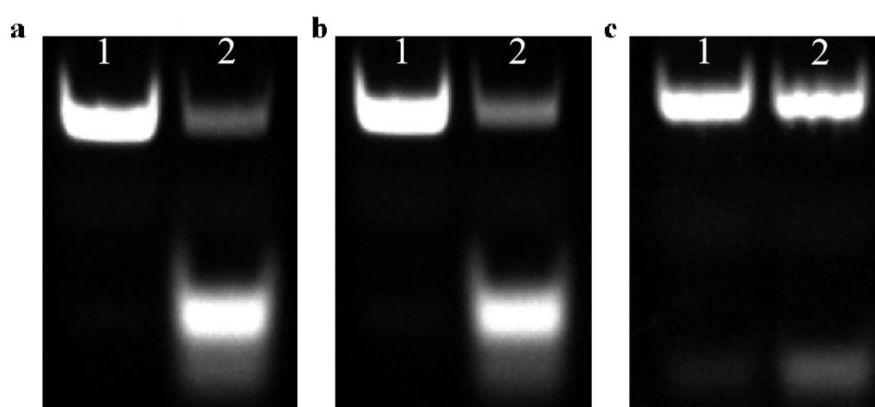

**Fig.S2.** PAGE validation of three types of targets. (a) Line 1: KS-H1+KS-H2+LS+RNP+FAM-S2, Line 2: HPV-16+KS-H1+KS-H2+LS+RNP+FAM-S2. (b) Line 1: KS-K1+KS-K2+LS+RNP+FAM-S2, Line 2: KAN+KS-H1+KS-H2+LS+RNP+FAM-S2. (c) Line 1: KS-U+EndIV+LS+RNP+FAM-S2, Line 2: UDG+KS-U+End IV+LS+RNP+FAM-S2.

After the KS sequence was exposed to different types of targets allostereism, trans-cleavage activity of CRISPR/Cas12a was confirmed by PAGE analysis. As shown in Fig. S2a, in the presence of the small molecule HPV-16, a new cleaved FAM-S2 band appears below lane 2. Similarly, as shown in Fig. S2b, the addition of KAN also results in a cleavage product migrating below lane 2. Furthermore, as depicted in Fig. S2c, when UDG is present, a cleaved FAM-S2 fragment is also observed below lane 2.

## 2.2 Optimization of reaction conditions for HPV-16 detection

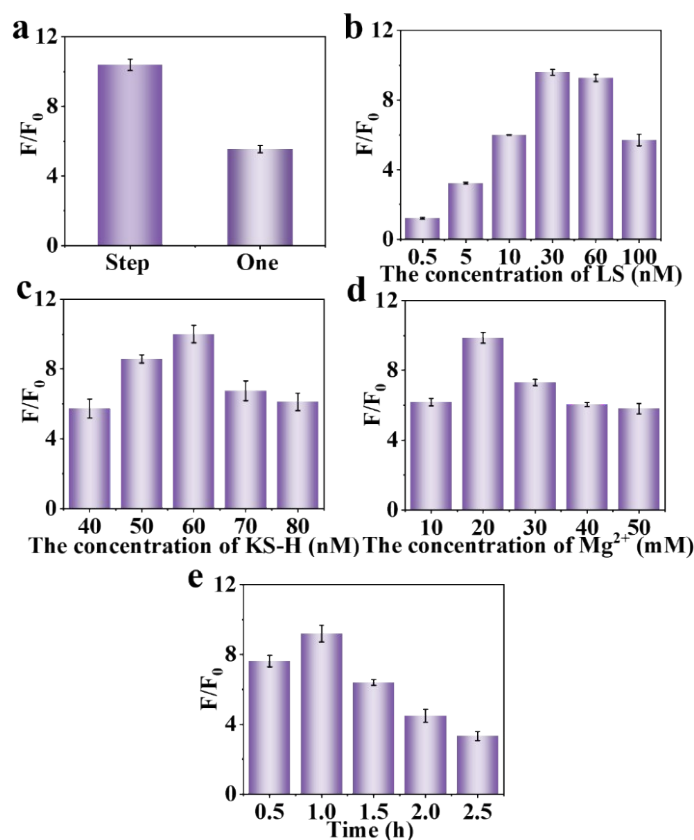

**Fig.S3.** Optimization of HPV-16 sensing system. **(a)** The  $F/F_0$  value of target binding and trans-cleavage compared with one one-pot method. **(b)**  $F/F_0$  values of different LS probe concentrations. **(c)**  $F/F_0$  values of different KS-H cleavage probes at different concentrations. **(d)**  $F/F_0$  value at different  $Mg^{2+}$  concentrations. **(e)**  $F/F_0$  values of HPV-16 at different reaction times. (The target concentration of HPV-16 was 50 nM). Error bars represent the standard deviation of three repetitive experiments.

As shown in Fig. S3a, the stepwise method has a higher  $F/F_0$  result than the one-pot method. Therefore, the target binding and trans-cleavage are performed step by step. As shown in Fig. S3b, in the HPV-16 sensing system, the  $F/F_0$  signal is strongest when the probe LS concentration is 30 nM. As shown in Fig. S3c, the  $F/F_0$  signal was strongest when the concentration of split probe KS-H1/H2 was 60 nM. As shown in Fig. S3d, the  $F/F_0$  signal is strongest when the concentration of magnesium ions in the buffer solution is 20 mM. As shown in Fig. S3e, the optimal reaction time is 1 hour.

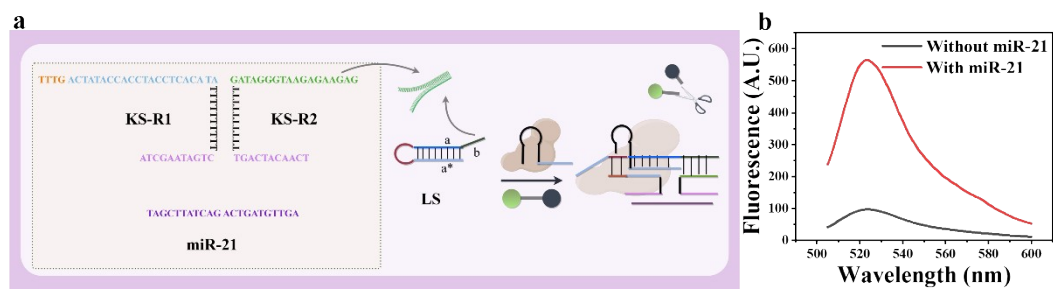

**Fig.S4.** (a) Schematic representation and working principle of miR-21 detection. (b) Fluorescence intensity of CRISPR/Cas12a biosensor with/without miR-21 (100 nM).

To validate the applicability of the proposed CRISPR/Cas12a biosensor and experimental conditions in detecting other nucleic acid targets, we chose another tumor marker, microRNA-21 (miR-21), as a test sample. Since the recognition of HPV by the CRISPR/Cas12a sensor is based on the complementary base-pairing of nucleic acids, we merely substituted the sequences in KS-H1 and KS-H2 that are complementary to HPV-16 with the corresponding sequences complementary to miR-21, designated as KS-R1 and KS-R2, while keeping the other regions intact (Fig.S4a). Consequently, both the cleavage site (the interval where the KS sequence splits into two parts) and the spacer arm sequence are the same as those of HPV-16. The complementary base sequences were attached to the 3' end of KS-R1 and the 5' end of KS-R2 according to the sequence of miR-21. In Fig S4b, we selected 100 nM of miR-21 for verification. The experimental conditions were precisely the same as those employed for the detection of HPV-16. The experimental results indicated that the fluorescence signal value was higher in the presence of the target miR-21. Thus, the experiment with miR-21 verified that the CRISPR/Cas12a biosensor were applicable to other nucleic acid targets.

## 2.3 Table S2. Recovery of HPV-16 detection in serum from human samples

| Additon<br>(nmol/L) | Detection<br>(nmol/L) |       |       | Recovery<br>(%) | RSD<br>(%) |
|---------------------|-----------------------|-------|-------|-----------------|------------|
|                     | 1                     | 2     | 3     |                 |            |
| 10                  | 9.06                  | 9.31  | 8.65  | 90.07           | 3.70       |
| 25                  | 26.20                 | 25.73 | 28.37 | 107.07          | 5.26       |
| 40                  | 38.00                 | 37.57 | 40.25 | 96.52           | 3.73       |

Each group of samples were run in parallel three times (error bars n=3)

## 2.4 Optimization of reaction conditions for KAN detection

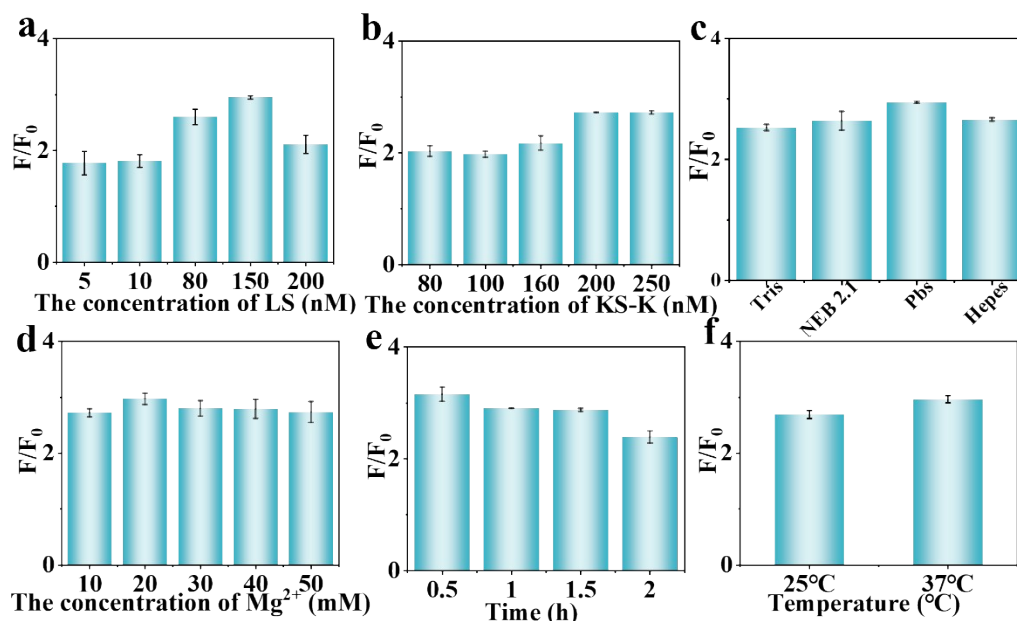

**Fig.S5.** Optimization of KAN sensing system. **(a)** F/F<sub>0</sub> values of different LS probe concentrations. **(b)** F/F<sub>0</sub> values of different KS-K cleavage probes at different concentrations. **(c)** The F/F<sub>0</sub> results of KAN binding to different types of buffer solutions. **(d)** F/F<sub>0</sub> value at different Mg<sup>2+</sup> concentrations. **(e)** F/F<sub>0</sub> values of KAN at different reaction times. **(f)** The F/F<sub>0</sub> value of KAN binding was affected by different reaction temperatures. (The target concentration of KAN was 100 nM). Error bars represent the standard deviation of three repetitive experiments.

As shown in Fig. S5, in the KAN sensing system, the F/F<sub>0</sub> signal is strongest when the probe LS concentration is 150 nM. The F/F<sub>0</sub> signal was strongest when the concentration of split probe KS-K1/K2 was 200 nM. The F/F<sub>0</sub> of PBS buffer was slightly higher, and all subsequent experiments were conducted with PBS buffer. The F/F<sub>0</sub> signal is strongest when the concentration of magnesium ions in the buffer solution is 20 mM. The optimal reaction time is 0.5 hours, and the optimal reaction temperature is 37°C.

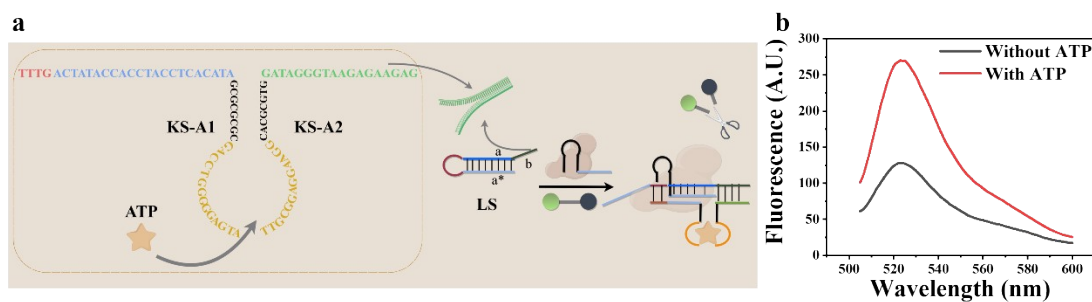

**Fig.S6. (a)** Schematic representation and working principle of ATP detection. **(b)** Fluorescence intensity of CRISPR/Cas12a biosensor with/without ATP (200  $\mu$ M).

To validate the applicability of the proposed CRISPR/Cas12a biosensor and experimental conditions in the detection of other small molecules, we chose another important biomarker with specific aptamer, ATP, as a test sample. Based on the split ATP aptamers in previous work,<sup>1</sup> the KS chain was transformed into KS-A1 and KS-A2 by replacing the KAN aptamer sequence of KAN-CRISPR/Cas12a biosensor (KS-K1 and KS-K2) with ATP aptamer (Fig.S6a). Similarly, the ATP aptamer sequences were ligated to the 3' end of KS-A1 and the 5' end of KS-A2 respectively, forming a complete ATP aptamer sequence in the presence of a target. The PAM sequences of KS-A1 and KS-A2 are identical, with their a\* and b\* sequences being completely the same. We selected 200  $\mu$ M ATP to validate the feasibility of CRISPR/Cas12a biosensor in ATP detection. Except for the buffer solution of the ATP-binding aptamer in the first step being different, all other experimental conditions are the same as KAN detection. The MES buffer (1 M NaCl, 20 mM  $Mg^{2+}$ , 10 mM MES, pH 7.2) solution was selected as the buffer, which is a mature method reported in the literature<sup>2</sup> and previously validated by our research group. The experimental results indicated that the fluorescence signal value was higher in the presence of the target ATP. Thus, the experiment with ATP verified that the CRISPR/Cas12a biosensor were applicable to other small molecules.

**2.5 Table S3. Detection of recovery of KAN in pure milk and lake water**

| Add<br>(nmol/L) |     | Detection<br>(nmol/L) |        |        | Recovery<br>(%) | RSD<br>(%) |
|-----------------|-----|-----------------------|--------|--------|-----------------|------------|
|                 |     | 1                     | 2      | 3      |                 |            |
| pure milk       | 10  | 13.46                 | 14.33  | 15.12  | 106.13          | 3.53       |
|                 | 50  | 51.10                 | 61.81  | 69.76  | 106.89          | 5.09       |
|                 | 100 | 119.21                | 105.28 | 105.27 | 107.93          | 3.46       |
| lake water      | 10  | 4.57                  | 11.34  | 9.13   | 98.75           | 2.63       |
|                 | 50  | 44.25                 | 37.72  | 53.78  | 97.78           | 4.81       |
|                 | 100 | 82.36                 | 109.13 | 111.49 | 103.79          | 7.23       |

  

| Add<br>( $\mu$ mol/L) |    | Detection<br>( $\mu$ mol/L) |       |       | Recovery<br>(%) | RSD<br>(%) |
|-----------------------|----|-----------------------------|-------|-------|-----------------|------------|
|                       |    | 1                           | 2     | 3     |                 |            |
| pure milk             | 20 | 19.36                       | 22.75 | 19.42 | 102.56          | 9.46       |
|                       | 30 | 33.19                       | 30.01 | 33.35 | 107.28          | 5.85       |
|                       | 45 | 51.53                       | 49.90 | 49.30 | 111.56          | 2.30       |
| lake water            | 20 | 21.44                       | 19.80 | 22.26 | 105.83          | 5.92       |
|                       | 30 | 28.49                       | 26.52 | 26.85 | 90.96           | 3.87       |
|                       | 45 | 48.04                       | 49.35 | 49.30 | 108.66          | 1.52       |

Each group of samples were run in parallel three times (error bars n=3)

## 2.6 Optimization of UDG detection reaction conditions

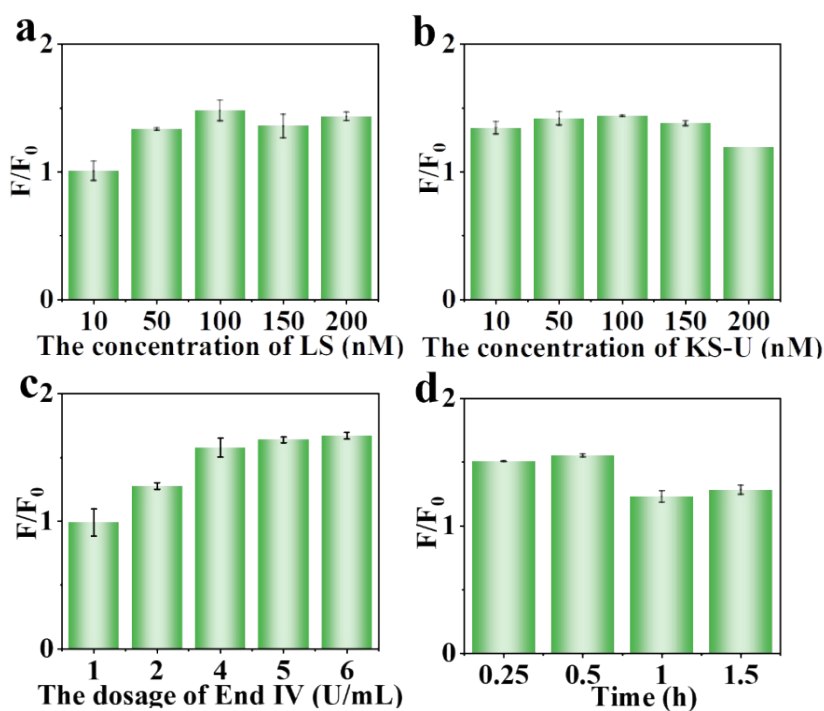

**Fig.S7.** Optimization of UDG sensing system. **(a)**  $F/F_0$  values of different LS probe concentrations. **(b)**  $F/F_0$  values of different KS-U cleavage probes at different concentrations. **(c)**  $F/F_0$  values of nucleases with different concentrations. **(d)**  $F/F_0$  values of UDG at different reaction times. (The target concentration of UDG was 1 U/mL). Error bars represent the standard deviation of three repetitive experiments.

As shown in Fig. S7a, the  $F/F_0$  signal is strongest in the UDG sensing system when the probe LS concentration reaches 100 nM. Similarly, as presented in Fig. S7b, the maximum  $F/F_0$  signal is observed when the KS-U concentration is 100 nM. According to Fig. S7c, the highest  $F/F_0$  signal is achieved with an End IV concentration of 4 U/mL. Finally, as illustrated in Fig. S7d, the optimal reaction time is determined to be 0.5 hours.

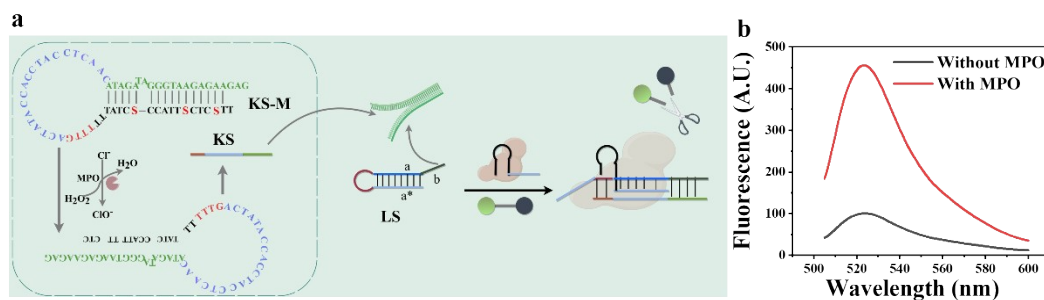

**Fig.S8.** (a) Schematic representation and working principle of MPO detection. (b) Fluorescence intensity of CRISPR/Cas12a biosensor with/without MPO (200 ng/mL).

To validate the applicability of the proposed CRISPR/Cas12a biosensor and experimental conditions in the detection of other enzymes with specific cleavage sites, we chose another important bio markers of cardiovascular diseases, myeloperoxidase (MPO), as a test sample. The sequence design of MPO maintains the stable hairpin structure identical to KS-U, in which the three U bases are replaced with thiol sites, named as KS-M (Fig.S8a). MPO catalyzes the cleavage of thiol sites by generating  $\text{ClO}^-$  from  $\text{H}_2\text{O}_2$  and  $\text{Cl}^-$ .<sup>3</sup> Subsequently, the stem of the KS-M hairpin structure is destroyed, causing the hairpin to unfold and release KS. In the KS-M sequence, the PAM and a\* sequences are also fixed at the hairpin to unfold and release KS. In the KS-M sequence, the PAM and a\* sequences are also fixed at the hairpin loop, while the b\* sequence serves as the stem to stabilize the hairpin structure. In Fig S8b, we selected 200 ng/mL MPO to validate the feasibility of CRISPR/Cas12a biosensor in MPO detection. All other experimental conditions are the same as UDG detection, except for the buffer solution of the enzyme cleavage in the first step. 200  $\mu\text{M}$   $\text{H}_2\text{O}_2$  and 1 mM NaCl were added to the reaction of MPO cleavage on thio sites in NaAc-HAc buffer (5 mM NaAc-HAc, pH 6.0, 10 mM NaCl). This enzyme cleavage condition was referred to a well-established method in the reported literature.<sup>4</sup> The experimental results show that when the target substance MPO is present, the hairpin structure of KS-M is destroyed, which activates the trans-cleavage activity of CRISPR/Cas12a, giving a higher fluorescence signal. Therefore, the experiment with MPO verified that the CRISPR/Cas12a biosensor was applicable to other enzymes with specific cleavage sites.

## 2.7 UGI inhibitor analysis

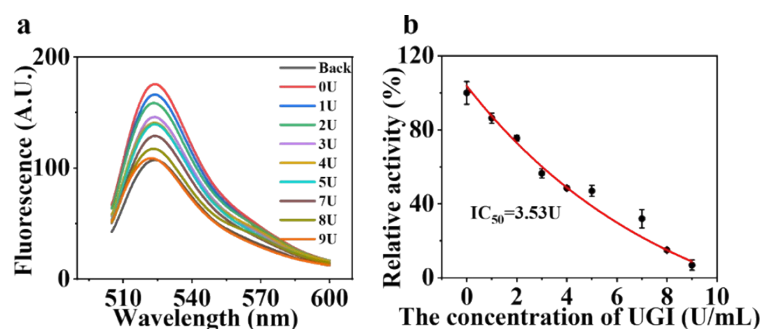

**Fig.S9.** (a) The fluorescence signal curves of different concentrations of UGI were added. (b) Relationship diagram of relative inhibitory activity of UGI on UDG at different concentrations. (The target concentration of UDG was 1 U/mL. Relative activity (%):  $F_{UGI}$ ). Error bars represent the standard deviation of three repetitive experiments.

To evaluate the applicability of UDG biosensors in UDG inhibition assays, various concentrations of UGI (0, 1, 2, 3, 4, 5, 7, 8, and 9 U/mL) were selected for experimental validation. The results demonstrate that the fluorescence signals gradually decrease with increasing UGI concentration (Fig. S9a). As shown in Fig. S9b, in the absence of UGI, the relative fluorescence intensity reaches nearly 100%. When the UGI concentration was increased to 9 U/mL, UGI almost completely inhibited UDG activity. Based on this data, the  $IC_{50}$  was calculated to be 3.53 U/mL.

## 2.8 UDG expression in cancer cells

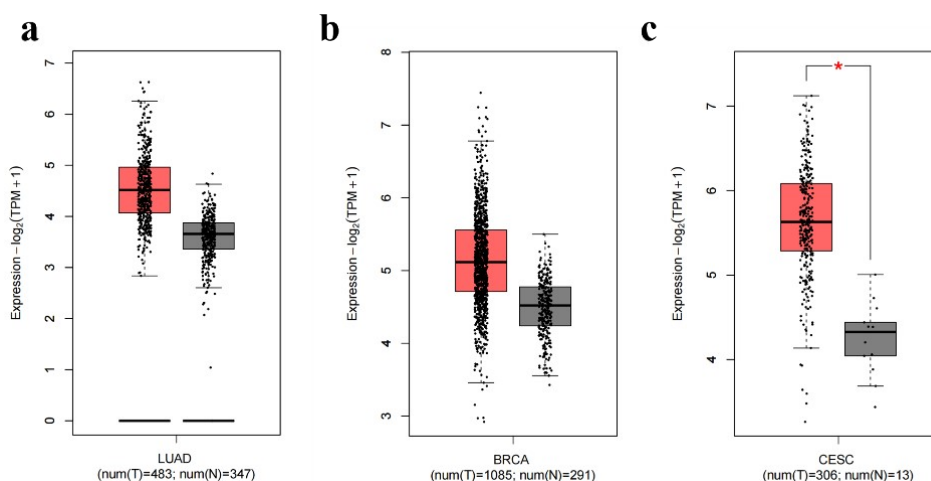

**Fig.S10.** The overexpression level of UDG in cancer cells checked on the GEPIA2 website. (a) Lung Adenocarcinoma (LUAD), (b) Breast Cancer Susceptibility Gene (BRCA), (c). Cervical Squamous Cell Carcinoma (CESC).

## 2.9 Detection of UDG activity in cancer cell lysate

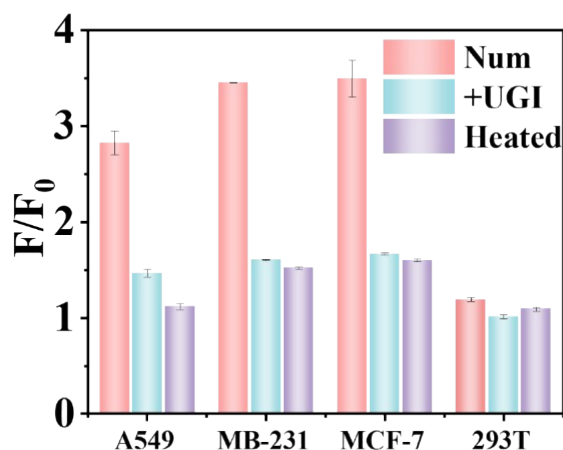

**Fig.S11.** UDG was directly detected in A549, MB-231, MCF-7, and 293T cell lysates, and the signal-to-noise ratio was detected after the UGI inhibitor was added and inactivated cell lysates were heated. Each group of samples were run in parallel three times (error bars n=3). Error bars represent the standard deviation of three repetitive experiments.

## 2.10 Cas12/13 nucleic acid strips to validate three target sensors

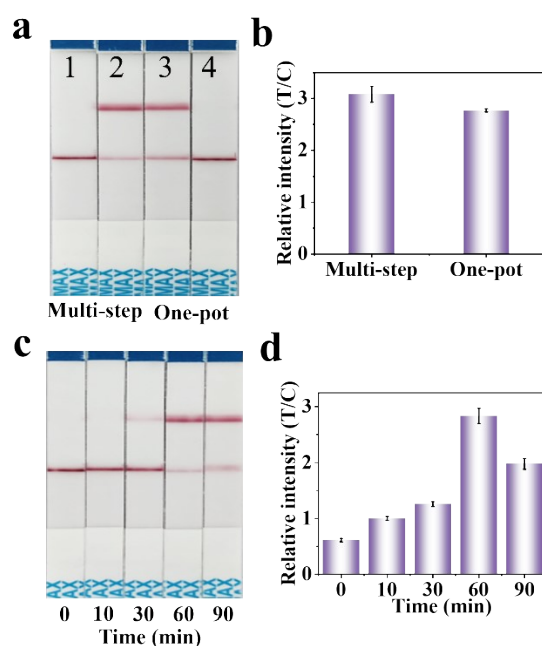

**Fig.S12. (a-b)** The test strip detection results **(a)** and corresponding T/C values **(b)** of multi-step and one-step (test strip 1 and 4 are the results without HPV-16, test strip 2 and 3 are the results with HPV-16). **(c-d)** Results of test strips **(c)** and corresponding T/C values **(d)** at different reaction times (0, 10, 30, 60, 90 min). The target concentration of HPV-16 was 1  $\mu$ M. Error bars represent the standard deviation of three repetitive experiments.

**Table S4. Recovery of HPV-16 detection in serum from human samples**

| Additon<br>( $\mu\text{mol/L}$ ) | Detection<br>( $\mu\text{mol/L}$ ) |      |      | Recovery<br>(%) | RSD<br>(%) |
|----------------------------------|------------------------------------|------|------|-----------------|------------|
|                                  | 1                                  | 2    | 3    |                 |            |
| 0.4                              | 0.42                               | 0.4  | 0.38 | 100.28          | 5.41       |
| 0.8                              | 0.95                               | 0.89 | 0.89 | 113.75          | 3.81       |
| 1.2                              | 1.27                               | 1.31 | 1.23 | 105.83          | 3.15       |

Each group of samples were run in parallel three times (error bars n=3)

**Table S5. Detection of recovery of KAN in pure milk and lake water**

|            | Add<br>( $\mu\text{mol/L}$ ) | Detection<br>( $\mu\text{mol/L}$ ) |       |       | Recovery<br>(%) | RSD<br>(%) |
|------------|------------------------------|------------------------------------|-------|-------|-----------------|------------|
|            |                              | 1                                  | 2     | 3     |                 |            |
| pure milk  | 5                            | 4.57                               | 4.67  | 4.5   | 91.60           | 1.07       |
|            | 20                           | 21.49                              | 20.58 | 20.31 | 103.97          | 1.72       |
|            | 40                           | 38.14                              | 41.24 | 41.15 | 100.44          | 2.53       |
| lake water | 5                            | 5.39                               | 5.75  | 5.57  | 111.40          | 3.23       |
|            | 20                           | 20.86                              | 20.76 | 20.58 | 103.67          | 1.36       |
|            | 40                           | 39.69                              | 40.61 | 39.14 | 99.53           | 1.86       |

Each group of samples were run in parallel three times (error bars  $n=3$ )

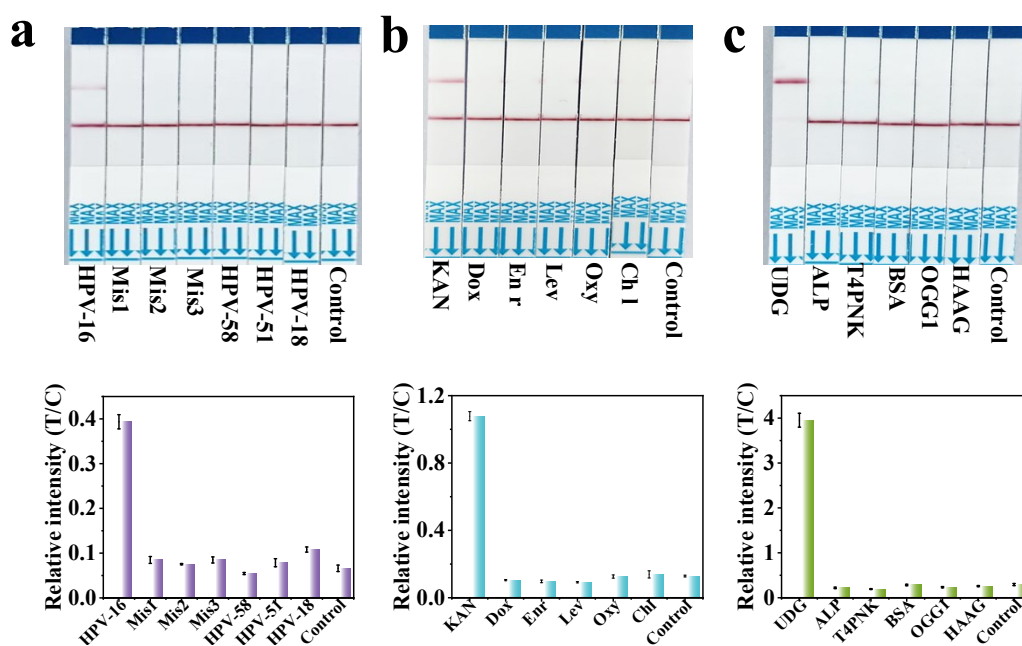

**Fig.S13.** (a) HPV-16-specific test strip detection results (above) and corresponding relative T/C intensity values (below) ( $C_{\text{target}}=2 \mu\text{M}$ ). (b) KAN-specific test strip detection results (above) and corresponding relative T/C intensity values (below) ( $C_{\text{target}}=5 \mu\text{M}$ ). (c) UDG-specific test strip detection results (above) and corresponding relative T/C intensity values (below) ( $C_{\text{target}}=40 \text{ U/mL}$ ). Error bars represent the standard deviation of three repetitive experiments.

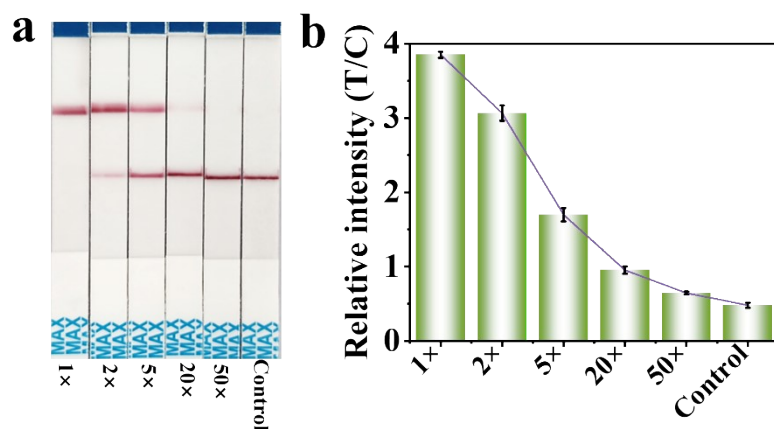

**Fig.S14.** (a) Test strip results and (b) corresponding relative T/C intensity values of MCF-7 cell lysis buffer diluted at various concentrations (undiluted, 2×, 5×, 20×, 50×, and blank). Each group of samples were run in parallel three times (error bars n=3). Error bars represent the standard deviation of three repetitive experiments.

**Table S6.** The LFA proposed in this study was compared with existing point-of-care testing (POCT) methods.

| Methods                                            | Amplification | Enzyme | Target                              | Time | LOD                                                                                              | Reference    |
|----------------------------------------------------|---------------|--------|-------------------------------------|------|--------------------------------------------------------------------------------------------------|--------------|
| CRISPR-distance-based biosensor                    | SDA           | Yes    | miRNA                               | 2 h  | 6.28 pM                                                                                          | <sup>5</sup> |
| (CRISPR/Cas12a-Responsive Indicators@RCA hydrogels | RCA           | Yes    | genetic                             | 5 h  | 2 copies/ $\mu$ L                                                                                | <sup>6</sup> |
| CRISPR-CHLFA                                       | RPA           | No     | SARS-CoV-2                          | 1 h  | 1–10 copy of target                                                                              | <sup>7</sup> |
| CRISPR-LFA/PGM                                     | RAA           | Yes    | invA gene of <i>Salmonella</i>      | 2 h  | 33 CFU/mL, 20 CFU/mL                                                                             | <sup>8</sup> |
| CRISPR-PGM                                         | No            | Yes    | AFP                                 | 2.5h | 10 ng/mL                                                                                         | <sup>9</sup> |
| CRISPR-LFA                                         | No            | No     | Nucleic Acid/Small Molecule/Protein | <2 h | LOD <sub>HPV-16</sub> =27 nM, LOD <sub>KAN</sub> =0.82 $\mu$ M and LOD <sub>UDG</sub> =0.15 U/mL | This work    |



**Table S7.** Three methods for detecting the target were compared.

| Target             | Model                                                                             | LOD                                 | Range                                  | Reference |
|--------------------|-----------------------------------------------------------------------------------|-------------------------------------|----------------------------------------|-----------|
| HPV-16             | electrochemical                                                                   | 18.13 nM                            | 18.75-250 nM                           | 10        |
| HPV-16             | electrochemical<br>resistive                                                      | 2.39 nM                             | 5-20 nM                                | 11        |
| HPV-16             | Keggin-type<br>polyoxometalate<br>(SiW12)-grafted<br>CdS quantum<br>dots -Au NPs  | 0.8 nM                              | 15-130 nM                              | 12        |
| KAN                | Nanomaterials-<br>based bioinspired<br>enzyme mimics                              | 15.28 nM                            | 15.28 nM-46.14<br>nM                   | 13        |
| KAN                | fluorescence and<br>colorimetric<br>signals                                       | 7.3 nM and<br>14.5 nM               | 50-1000 nM<br>100-800 nM               | 14        |
| KAN                | fluorescence<br>resonance energy<br>transfer (FRET)                               | 18.9 nM                             | 0.05–50 nM                             | 15        |
| UDG                | UDG-REtarded<br>CRISPR                                                            | $9.17 \times 10^{-4}$<br>U/mL       | 0.001 to 1 U/mL                        | 16        |
| UDG                | electrochemical                                                                   | 0.0079 U/mL                         | 0.01-10 U/mL                           | 17        |
| UDG                | intramolecular<br>inhibitory effect<br>of the adjacent<br>base-pair<br>(InE(N:N)) | 0.003 U/mL                          | 0 - 1.0 U/mL                           | 18        |
| HPV-<br>16/KAN/UDG | Fluorescence and<br>LFA                                                           | Fluorescence :<br>HPV-<br>16:0.0299 | Fluorescence:<br>HPV-16: 0.1 -50<br>nM | This work |

|  |  |                                                                                                                                                                      |                                                                                                                              |  |
|--|--|----------------------------------------------------------------------------------------------------------------------------------------------------------------------|------------------------------------------------------------------------------------------------------------------------------|--|
|  |  | nM ,<br>KAN:0.156<br>nM ,<br>UDG:0.0012<br>U/mL<br>LFA:<br>LOD <sub>HPV-16</sub> =27<br>nM LOD <sub>KAN</sub> =<br>0.82 $\mu$ M<br>LOD <sub>UDG</sub> = 0.15<br>U/mL | KAN: 10 -<br>100nM<br>UDG: 0.005 - 1<br>U/mL<br>LFA: HPV-<br>16:0.1-1.2 $\mu$ M<br>KAN: 1-40 $\mu$ M<br>UDG: 0.25-40<br>U/mL |  |
|--|--|----------------------------------------------------------------------------------------------------------------------------------------------------------------------|------------------------------------------------------------------------------------------------------------------------------|--|

1. Q.-N. Li, D.-X. Wang, G.-M. Han, B. Liu, A.-N. Tang and D.-M. Kong, *Analytical Chemistry*, 2023, **95**, 15725-15735.
2. C. McFarlane and J. Murray, *Bio-Protocol*, 2020, **10**.
3. S. J. Klebanoff, A. J. Kettle, H. Rosen, C. C. Winterbourn and W. M. Nauseef, *Journal of Leukocyte Biology*, 2013, **93**, 185-198.
4. J.-Y. Ma, B. Liu, S. Raza, H.-X. Jiang, A.-N. Tang and D.-M. Kong, *Sensors and Actuators B: Chemical*, 2023, **376**.
5. S. Feng, H. Chen, Z. Hu, T. Wu and Z. Liu, *ACS Applied Materials & Interfaces*, 2023, **15**, 28933-28940.
6. R. Zhao, Y. Tang, D. Song, M. Liu and B. Li, *Analytical Chemistry*, 2023, **95**, 18522-18529.
7. M. Cheng, C. Tan, B. Xiang, W. Lin, B. Cheng, X. Peng, Y. Yang and Y. Lin, *Analytica Chimica Acta*, 2023, **1270**.
8. Y. Wang, J. Cao, P. Du, W. Wang, P. Hu, Y. Liu, Y. Ma, X. Wang and A. M. Abd El-Aty, *Microchimica Acta*, 2024, **191**.
9. Z. Jia, Z. Li and C. Liu, *Sensors and Actuators B: Chemical*, 2023, **390**.
10. D. S. Campos-Ferreira, G. A. Nascimento, E. V. M. Souza, M. A. Souto-Maior, M. S. Arruda, D. M. L. Zanforlin, M. H. F. Ekert, D. Brunessa and J. L. Lima-Filho, *Analytica Chimica Acta*, 2013, **804**, 258-263.
11. J. R. Espinosa, M. Galván, A. S. Quiñones, J. L. Ayala, V. Ávila and S. M. Durón, *Molecules*, 2021, **26**.
12. Y. Cheng, C. Sun, Y. Chang, J. Wu, Z. Zhang, Y. Liu, S. Ge, Z. Li, X. Li, L. Sun and D. Zang, *Frontiers in Bioengineering and Biotechnology*, 2023, **11**.
13. W. Wang, Y. Yin and S. Gunasekaran, *Biosensors and Bioelectronics*, 2022, **218**.
14. Y. Tian, Y. Mou, W. Zhang, Z. Sun, Y. Yin, L. Han, D. Chen, Y. Guo, X. Sun, F. Li and Y. Wu, *Biosensors and Bioelectronics*, 2025, **268**.
15. Y. Zhang, R. Liu, M. M. Hassan, H. Li, Q. Ouyang and Q. Chen, *Spectrochimica Acta Part A: Molecular and Biomolecular Spectroscopy*, 2021, **262**.
16. H. Han, S. H. Jang, J. K. Ahn and C. Y. Lee, *Analytica Chimica Acta*, 2024, **1314**.
17. Zhang H, Zhang L, Jiang J and Y. R., *Analytical sciences*, 2013, **29**, 193-198.
18. Z. Su, Q. Wen, S. Li, L. Guo, M. Li, Y. Xiong, W. Li and J. Ren, *Analytica Chimica Acta*, 2022, **1221**.
